# Supplementary material for: Network pharmacology-based analysis for unraveling potential cancer-related molecular targets of Egyptian propolis phytoconstituents accompanied with molecular docking and in vitro studies
Source: Royal Society of Chemistry journal article supplement (doi:10.1039/d1ra01390d), 2021-01-01
Supplement: d1ra01390d4.csv [file d1ra01390d4.csv]

trihydroxymethylpropane	CCC(CO)(CO)CO
Quercetin-3-methylether	COC1=C(OC2=CC(=CC(=C2C1=O)O)O)C3=CC(=C(C=C3)O)O
Phenylethyl-trans- caffeate	1=CC=C(C=C1)CCOC(=O)C=CC2=CC(=C(C=C2)O)O
Kaempferol-3-methylether	COC1=C(OC2=CC(=CC(=C2C1=O)O)O)C3=CC=C(C=C3)O
Ethyloleate	CCCCCCCCC=CCCCCCCCC(=O)OCC
Di-isooctyl phthalate	CC(C)CCCCCOC(=O)C1=CC=CC=C1C(=O)OCCCCCC(C)C
Chrysin-7-methylether	COC1=CC(O)=C2C(=O)C=C(OC2=C1)C1=CC=CC=C1
Benzyl trans caffeate	C1=CC=C(C=C1)COC(=O)C=CC2=CC(=C(C=C2)O)O
Isovanilline	COC1=C(C=C(C=C1)C=O)O
4-Hydroxyphenyl ethanol	C1=CC(=CC=C1CCO)O
3-Methyl-3-butenyl-cis-caffeate	CC(=CCOC(=O)C=CC1=CC(=C(C=C1)O)O)C
3-Methyl-2-butenyl-trans-caffeate	CC(=CCOC(=O)/C=C/c1ccc(c(c1)O)O)C
Xylitole	C(C(C(C(CO)O)O)O)O
Vanillic acid	COC1=C(C=CC(=C1)C(=O)O)O
undecanoic acid	CCCCCCCCCCC(=O)O
tricosane	CCCCCCCCCCCCCCCCCCCCCCC
triacetin	CC(=O)OCC(COC(=O)C)OC(=O)C
trans p-coumaric acid	C1=CC(=CC=C1C=CC(=O)O)O
tetracosanoic acid	CCCCCCCCCCCCCCCCCCCCCCCC(=O)O
tectochrysin	COC1=CC(=C2C(=C1)OC(=CC2=O)C3=CC=CC=C3)O
succinic acid	C(CC(=O)O)C(=O)O
stearic acid	CCCCCCCCCCCCCCCCCC(=O)O
sesamin	C1C2C(COC2C3=CC4=C(C=C3)OCO4)C(O1)C5=CC6=C(C=C5)OCO6
rosmarinic acid	C1=CC(=C(C=C1CC(C(=O)O)OC(=O)C=CC2=CC(=C(C=C2)O)O)O)O
quercetin 7methylether	COC1=CC(=C2C(=C1)OC(=C(C2=O)O)C3=CC(=C(C=C3)O)O)O
quercetin 3 methylether	COC1=C(OC2=CC(=CC(=C2C1=O)O)O)C3=CC(=C(C=C3)O)O
quercetin-3,3`-dimethylether	COC1=C(C=CC(=C1)C2=C(C(=O)C3=C(C=C(C=C3O2)O)O)OC)O
quercetin	C1=CC(=C(C=C1C2=C(C(=O)C3=C(C=C(C=C3O2)O)O)O)O)O
prunetin	COC1=CC(=C2C(=C1)OC=C(C2=O)C3=CC=C(C=C3)O)O
pinostrobin chalcone	COC1=CC(=C(C(=C1)O)C(=O)C=CC2=CC=CC=C2)O
pinostrobin	COC1=CC(=C2C(=O)CC(OC2=C1)C3=CC=CC=C3)O
pinocembrin	C1C(OC2=CC(=CC(=C2C1=O)O)O)C3=CC=CC=C3
pinobanksin-3-acetate	CC(=O)OC1C(OC2=CC(=CC(=C2C1=O)O)O)C3=CC=CC=C3
pinobanksin	C1=CC=C(C=C1)C2C(C(=O)C3=C(C=C(C=C3O2)O)O)O
Phthalic acid, butyl dodecyl ester	CCCCCCCCCCCCOC(=O)C1=CC=CC=C1C(=O)OCCCC
phosphoric acid	OP(=O)(O)O
phathalic acid	C1=CC=C(C(=C1)C(=O)O)C(=O)O
pentytricosane	CCCCCCCCCCCC(CCCCC)CCCCCCCCCCC
pentadecanoic acid	CCCCCCCCCCCCCCC(=O)O
palmitic acid	CCCCCCCCCCCCCCCC(=O)O
oleic acid	CCCCCCCCC=CCCCCCCCC(=O)O
oleanitrile	CCCCCCCCC=CCCCCCCCC#N
octacosane	C1C(OC2=CC(=CC(=C2C1=O)O)O)C3=CC=C(C=C3)O
naringenin	C1C(OC2=CC(=CC(=C2C1=O)O)O)C3=CC=C(C=C3)O
myristic acid	CCCCCCCCCCCCCC(=O)O
myrectin	C1=C(C=C(C(=C1O)O)O)C2=C(C(=O)C3=C(C=C(C=C3O2)O)O)O
malic acid	C(C(C(=O)O)O)C(=O)O
luteolin-3`-methylether	COC1=C(C=CC(=C1)C2=CC(=O)C3=C(C=C(C=C3O2)O)O)O
luteolin	C1=CC(=C(C=C1C2=CC(=O)C3=C(C=C(C=C3O2)O)O)O)O
lupeol	CC(=C)C1CCC2(C1C3CCC4C5(CCC(C(C5CCC4(C3(CC2)C)C)(C)C)O)C)C
Liquiritigenin	C1C(OC2=C(C1=O)C=CC(=C2)O)C3=CC=C(C=C3)O
lauric acid	CCCCCCCCCCCC(=O)O
lanosterol acetate	CC(C)CCCC(C)C1CCC2(C1(CCC3=C2CCC4C3(CCC(C4(C)C)OC(=O)C)C)C)C
kaempferol	C1=CC(=CC=C1C2=C(C(=O)C3=C(C=C(C=C3O2)O)O)O)O
Izalpinin	COC1=CC(=C2C(=C1)OC(=C(C2=O)O)C3=CC=CC=C3)O
Isoferulic acid	COC1=C(C=C(C=C1)C=CC(=O)O)O
Hydrocoumaric acid	C1=CC(=CC(=C1)O)CCC(=O)O
Hydrocaffeic acid	C1=CC(=C(C=C1CCC(=O)O)O)O
Hesperetin	COC1=C(C=C(C=C1)C2CC(=O)C3=C(C=C(C=C3O2)O)O)O
Glycerol	C(C(CO)O)O
Gluconic acid	C(C(C(C(C(C(=O)O)O)O)O)O)O
Genkwanin	COC1=CC(=C2C(=C1)OC(=CC2=O)C3=CC=C(C=C3)O)O
Genistein	C1=CC(=CC=C1C2=COC3=CC(=CC(=C3C2=O)O)O)O
Galanin	C1=CC=C(C=C1)C2=C(C(=O)C3=C(C=C(C=C3O2)O)O)O
Formonontin	COC1=CC=C(C=C1)C2=COC3=C(C2=O)C=CC(=C3)O
Ferulic acid	COC1=C(C=CC(=C1)C=CC(=O)O)O
Eudesmol	CC12CCCC(=C)C1CC(CC2)C(C)(C)O
Ethylpalmitate	CCCCCCCCCCCCCCCC(=O)OCC
Eriodictyol	C1C(OC2=CC(=CC(=C2C1=O)O)O)C3=CC(=C(C=C3)O)O
Ellagic acid	C1=C2C3=C(C(=C1O)O)OC(=O)C4=CC(=C(C(=C43)OC2=O)O)O
Docosane	CCCCCCCCCCCCCCCCCCCCCC
Diphenyl ether	C1=CC=C(C=C1)OC2=CC=CC=C2
Dehydroabietic acid	CC(C)C1=CC2=C(C=C1)C3(CCCC(C3CC2)(C)C(=O)O)C
Decanoic acid	CCCCCCCCCC(=O)O
Cycloartenol	CC(CCC=C(C)C)C1CCC2(C1(CCC34C2CCC5C3(C4)CCC(C5(C)C)O)C)C
Coniferyl alchol	COC1=C(C=CC(=C1)C=CCO)O
cis-p-coumaric acid	C1=CC(=CC=C1C=CC(=O)O)O
Cinnamic acid	C1=CC=C(C=C1)C=CC(=O)O
Chrysin	C1=CC=C(C=C1)C2=CC(=O)C3=C(C=C(C=C3O2)O)O
Cerotic acid	CCCCCCCCCCCCCCCCCCCCCCCCCC(=O)O
Caffeic acid methyl ester	COC(=O)C=CC1=CC(=C(C=C1)O)O
Caffeic acid ethyl ester	CCOC(=O)C=CC1=CC(=C(C=C1)O)O
Caffeic acid	C1=CC(=C(C=C1C=CC(=O)O)O)O
Butyaldehyde	CCCC=O
Biochanin A	COC1=CC=C(C=C1)C2=COC3=CC(=CC(=C3C2=O)O)O
beta-amyrin	CC1(CCC2(CCC3(C(=CCC4C3(CCC5C4(CCC(C5(C)C)O)C)C)C2C1)C)C)C
Benzoic acid	C1=CC=C(C=C1)C(=O)O
Arachidonic acid	CCCCCCCCCCCCCCCCCCCC(=O)O
Apigenin	C1=CC(=CC=C1C2=CC(=O)C3=C(C=C(C=C3O2)O)O)O
alpha-amyrin	CC1CCC2(CCC3(C(=CCC4C3(CCC5C4(CCC(C5(C)C)O)C)C)C2C1C)C)C
Acacetin	COC1=CC=C(C=C1)C2=CC(=O)C3=C(C=C(C=C3O2)O)O
8-Methoxykaemferol	COC1=C(C=C(C2=C1OC(=C(C2=O)O)C3=CC=C(C=C3)O)O)O
5-hydroxy-n-valeric acid	C(CCO)CC(=O)O
4-methoxycinnamic acid	COC1=CC=C(C=C1)C=CC(=O)O
4-Hydroxy benzaldehyde	C1=CC(=CC=C1C=O)O
3-phenylpropanoic acid	C1=CC=C(C=C1)CCC(=O)O
3-hydroxy capric acid	CCCCCCCC(CC(=O)O)O
3,4-dimethoxy cinnamic acid	COC1=C(C=C(C=C1)C=CC(=O)O)OC
2-hydroxy hexacosanoic acid	CCCCCCCCCCCCCCCCCCCCCCCCC(C(=O)O)O
2,3-butandiol	CC(C(C)O)O
