# Supplementary figures and images for: Network pharmacology-based analysis for unraveling potential cancer-related molecular targets of Egyptian propolis phytoconstituents accompanied with molecular docking and in vitro studies
Source: PubMed Central journal article supplement — RSC Adv. 2021 Mar 22;11(19):11610–26. doi: 10.1039/d1ra01390d (PMC8695995; doi:10.1039/d1ra01390d), 2021-03-22

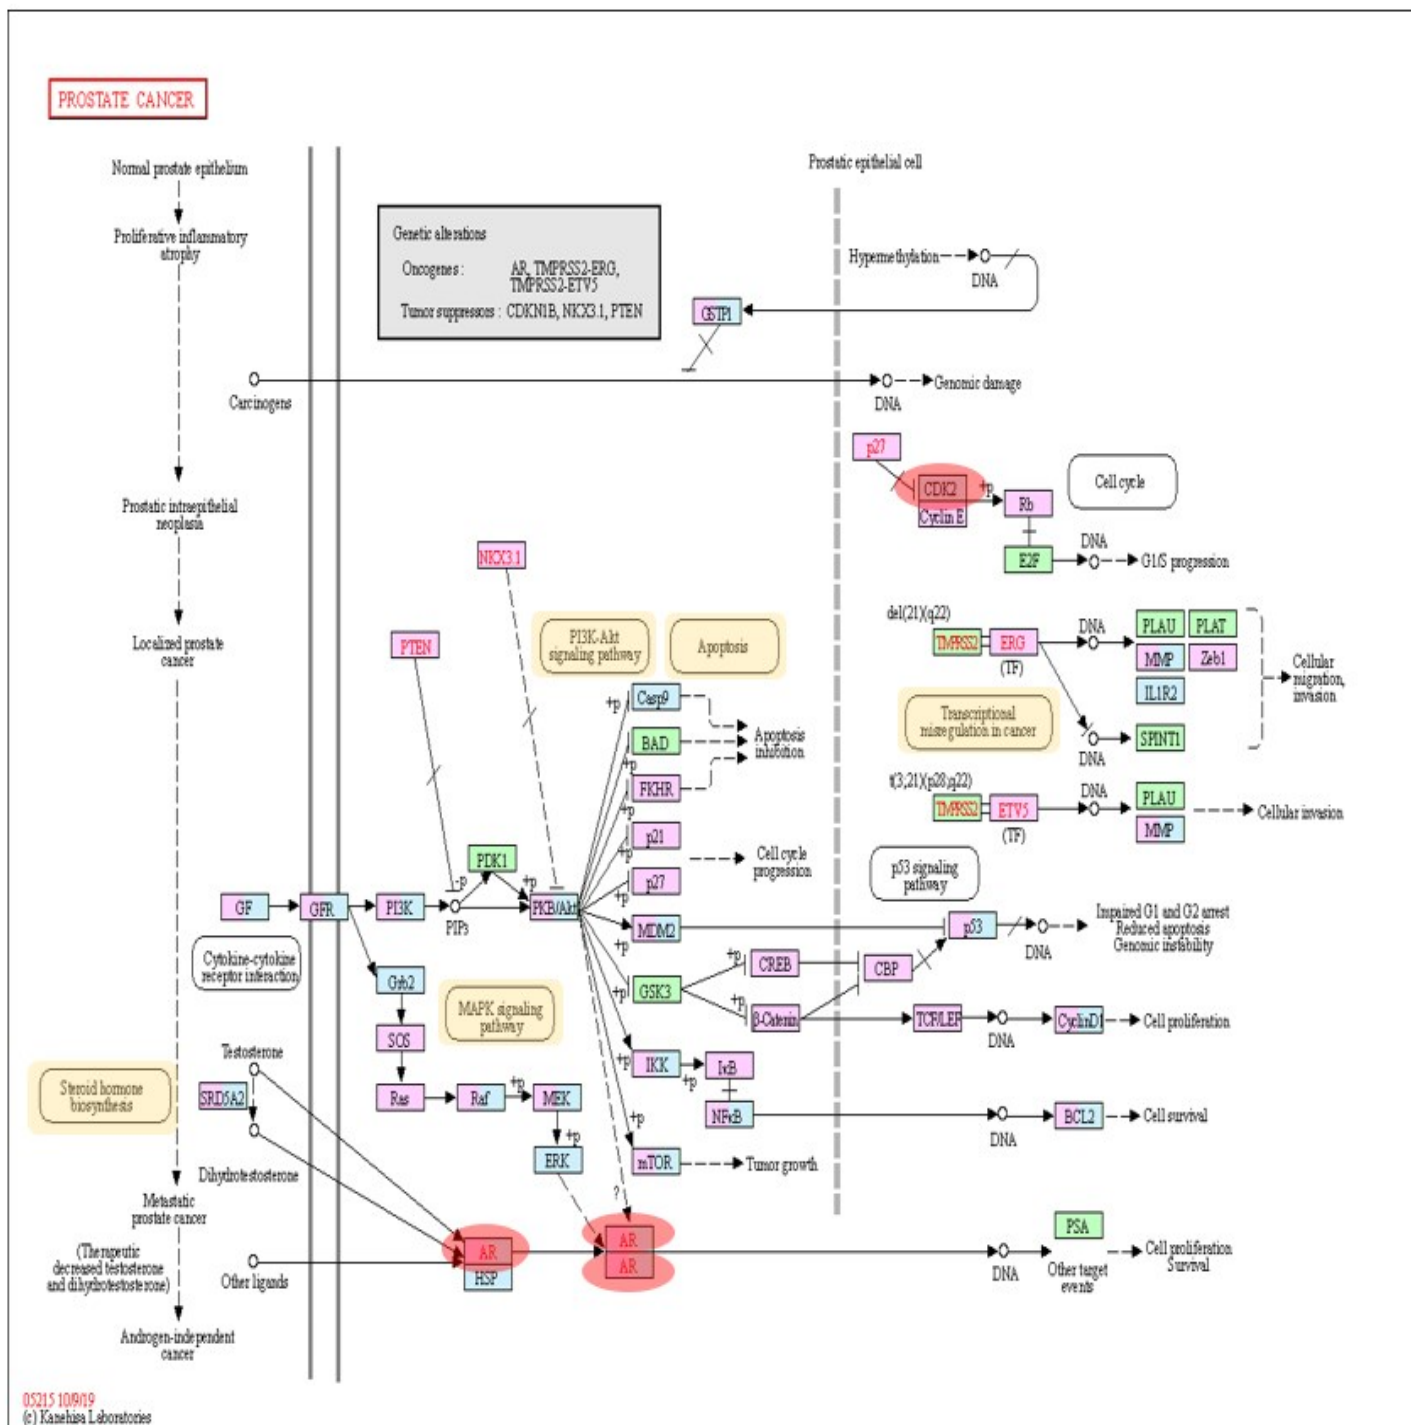

Supplement: RA-011-D1RA01390D-s001.pdf [file RA-011-D1RA01390D-s001.pdf]

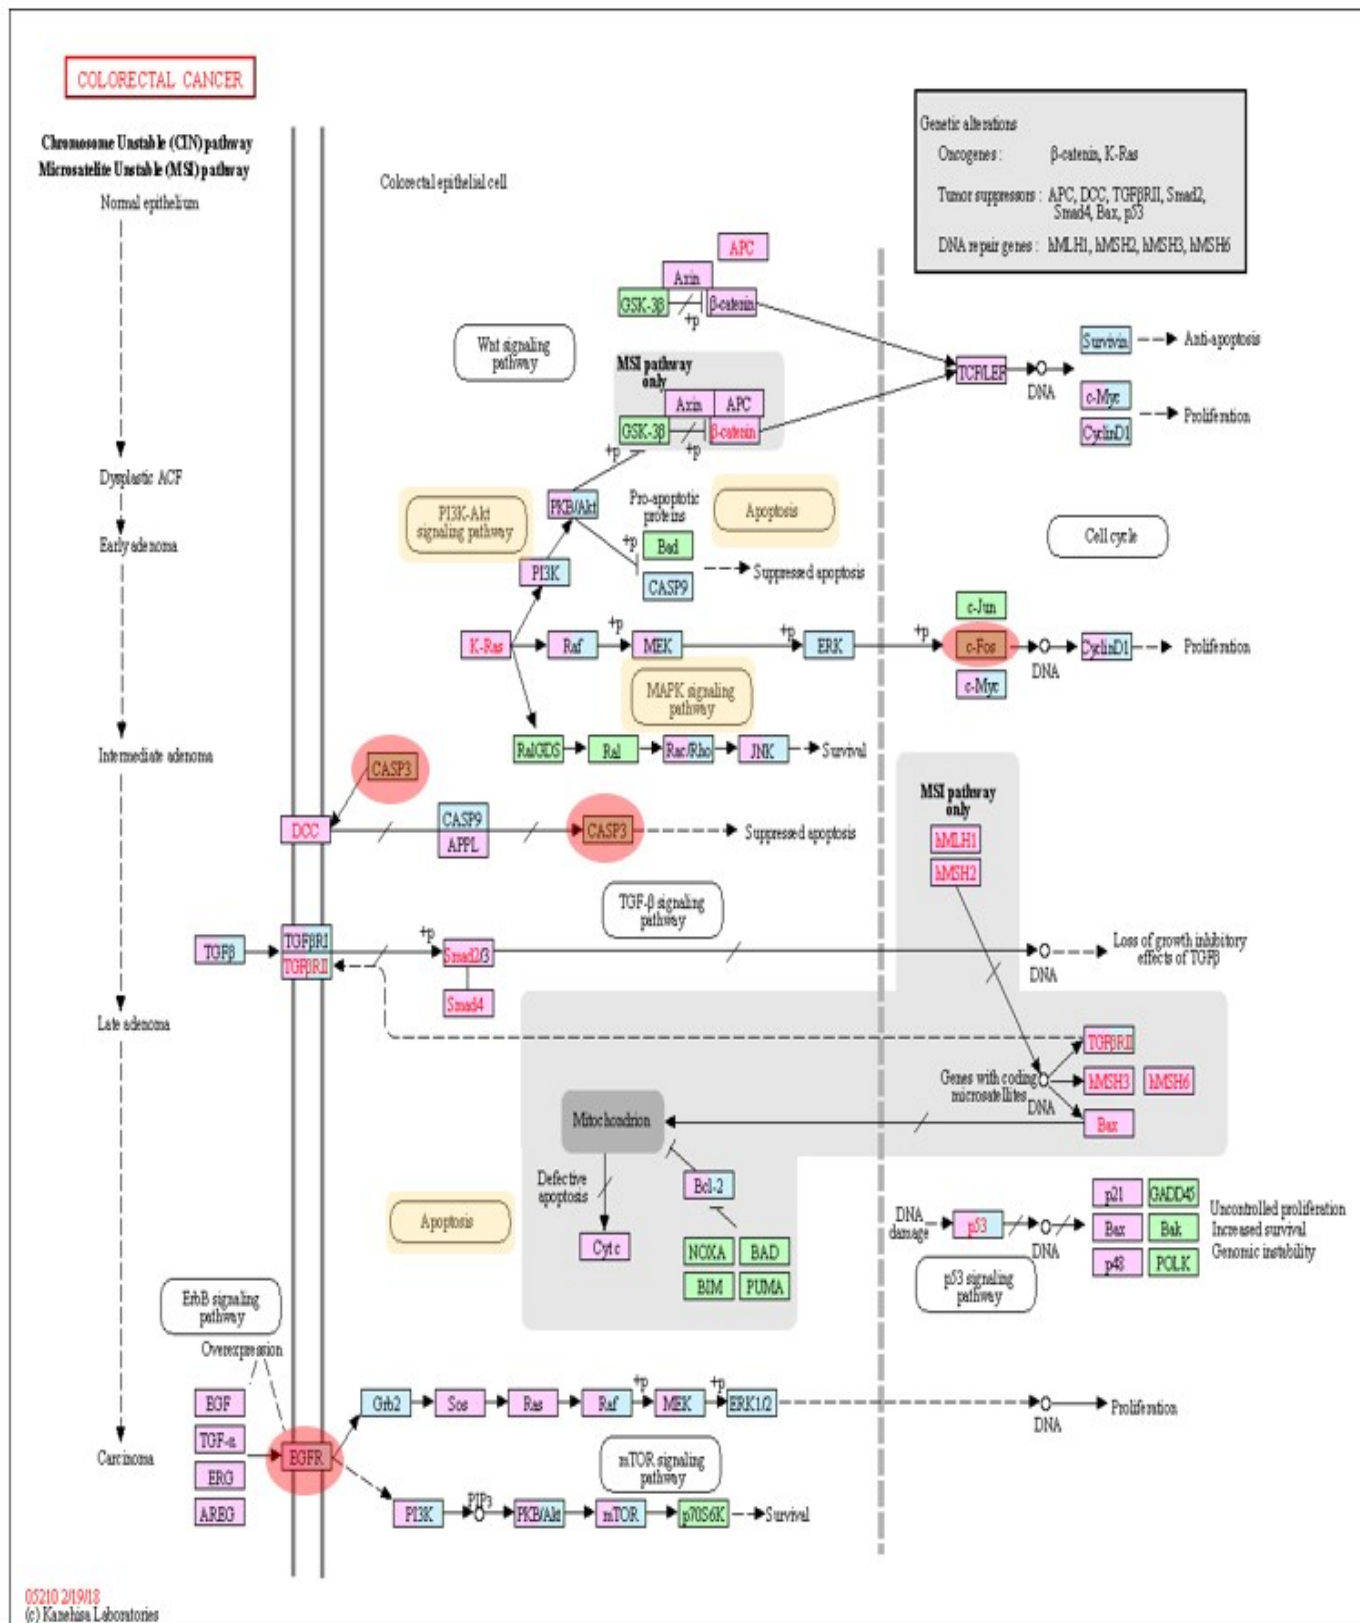

Supplement: RA-011-D1RA01390D-s003.pdf [file RA-011-D1RA01390D-s003.pdf]
